# Supplementary material for: The mutual interactions among Helicobacter pylori, chronic gastritis, and the gut microbiota: a population-based study in Jinjiang, Fujian
Source: Front Microbiol. 2024 Feb 14;15:1365043. doi: 10.3389/fmicb.2024.1365043 (PMC10899393; doi:10.3389/fmicb.2024.1365043)
Supplement: Supplementary file 1 [file Table_1.XLSX]

## Sheet: Sheet1
Supplementary table 1. The genera proportion of group Normal, CNAG, CAG at the genus level (relative amount)
Genus	Normal	CNAG	CAG
uncultured	0.00126	0.00132	0.00106
Actinomyces	0.00016	0.00029	0.00025
Bifidobacterium	0.0027	0.00371	0.00289
Collinsella	0.00065	0.0006	0.00096
uncultured	0.00116	0.00193	0.00307
uncultured	0.00631	0.00538	0.00255
Parabacteroides	0.30388	0.30242	0.31289
Barnesiella	0.00194	0.00164	0.0011
Coprobacter	0.0021	0.00029	0.00043
uncultured	0.00022	0.00019	0.00017
Butyricimonas	0.00354	0.00187	0.00262
Odoribacter	0.00193	0.00086	0.00194
Porphyromonas	6e-05	0.00088	0.00236
uncultured	0.00053	0.00046	0.00041
Alloprevotella	0.00696	0.00766	0.00351
Paraprevotella	0.00503	0.0026	0.00298
Prevotella	0.15929	0.12937	0.09427
Prevotellaceae_NK3B31_group	0.00749	0.00125	0.00046
uncultured	2e-05	0.00011	0.00128
Alistipes	0.00627	0.00559	0.00885
uncultured	0.00045	0.00037	0.00097
Parabacteroides	0.01162	0.02204	0.01761
Campylobacter	0.00012	0.00058	0.00038
Bilophila	0.00212	0.00133	0.00223
Desulfovibrio	0.00181	0.00063	0.00104
uncultured	0.00096	0.00084	0.00066
uncultured	0.00018	8e-05	0.00017
Candidatus_Stoquefichus	2e-05	8e-05	0.0004
Erysipelatoclostridium	0.00023	0.00048	0.00067
Erysipelotrichaceae_UCG-003	0.00152	0.00253	0.00158
Faecalitalea	0.0002	0.00019	0.00022
Holdemanella	0.00031	0.00018	0.00033
Turicibacter	0.00014	0.00022	0.00011
uncultured	6e-05	0.00031	0.00021
Granulicatella	0.00012	0.00031	0.00028
Enterococcus	0.0001	0.00186	0.00037
Lactobacillus	0.00024	0.00157	0.00092
Weissella	3e-05	0.0015	0.00026
Streptococcus	0.00384	0.01047	0.00894
Firmicutes_RF39	0.00055	0.00019	0.00044
uncultured	0.00168	0.00143	0.00155
Christensenellaceae_R-7_group	0.00202	0.00164	0.00348
Clostridia_UCG-014	0.0034	0.00229	0.00444
Clostridia_vadinBB60_group	0.00012	0.00021	0.00014
Clostridium_sensu_stricto_1	0.0013	0.00149	0.0039
uncultured	0.06092	0.06144	0.07336
Agathobacter	0.00059	0.00157	0.00069
Anaerostignum	0.00036	0.00037	0.00068
Anaerostipes	0.00077	0.00214	0.00109
Blautia	0.00176	0.00312	0.00323
Lachnospiraceae_CAG-56	0.00106	0.00043	0.00069
Coprococcus	0.00545	0.00274	0.00629
Dorea	0.00207	0.00189	0.0021
Eisenbergiella	0.00015	0.00046	0.00067
Epulopiscium	1e-05	2e-05	0.00102
Fusicatenibacter	0.002	0.00281	0.00292
Lachnospiraceae_GCA-900066575	0.00018	0.0001	0.00018
Hungatella	0.00018	0.00032	0.00053
Lachnoclostridium	0.00583	0.01207	0.01297
Lachnospira	0.01211	0.01613	0.01576
Lachnospiraceae_ND3007_group	0.00121	0.00196	0.00216
Lachnospiraceae_NK4A136_group	0.00209	0.00114	0.00289
Lachnospiraceae_UCG-001	0.0003	0.00011	0.0003
Lachnospiraceae_UCG-003	0.00316	0.00036	0.00213
Lachnospiraceae_UCG-004	0.00481	0.00376	0.00574
Lachnospiraceae_UCG-008	0.00029	0.00017	0.00029
Lachnospiraceae_UCG-010	0.0039	0.00204	0.00324
Roseburia	0.01107	0.01406	0.01681
Tyzzerella	0.00082	0.00262	0.0021
[Eubacterium]_eligens_group	0.01461	0.01202	0.01482
[Eubacterium]_hallii_group	0.0003	0.00079	0.00046
[Eubacterium]_ruminantium_group	0.00371	0.00217	0.00339
[Eubacterium]_ventriosum_group	0.00041	0.00106	0.00043
[Eubacterium]_xylanophilum_group	0.00011	0.00019	0.00028
[Ruminococcus]_gauvreauii_group	0.00018	0.00018	0.00016
[Ruminococcus]_gnavus_group	0.00444	0.00479	0.00408
[Ruminococcus]_torques_group	0.00367	0.00349	0.00365
uncultured	0.00125	0.00065	0.00051
Monoglobus	0.00127	0.0009	0.0009
uncultured	0.00925	0.0038	0.00752
Butyricicoccus	0.00263	0.00237	0.00334
Butyricicoccaceae_UCG-009	0.00028	4e-05	0.00013
uncultured	0.00681	0.00432	0.00524
Colidextribacter	0.00092	0.00068	0.00165
Flavonifractor	0.00064	0.00163	0.00178
Intestinimonas	0.00043	0.0003	0.00047
Oscillospiraceae_NK4A214_group	0.00013	0.00014	0.00013
Oscillibacter	0.00093	0.00115	0.00148
Oscillospiraceae_UCG-002	0.0031	0.00167	0.00242
Oscillospiraceae_UCG-003	0.00376	0.00154	0.00205
Oscillospiraceae_UCG-005	0.00102	0.00078	0.00085
uncultured	0.0003	0.00014	0.00025
uncultured	0.00118	0.00103	0.00155
Faecalibacterium	0.07317	0.0651	0.05896
Incertae_Sedis	0.00045	0.00065	0.00058
Negativibacillus	0.0011	0.00048	0.001
Phocea	0.0001	0.00012	0.00018
Ruminococcus	0.00565	0.00411	0.00429
Subdoligranulum	0.00482	0.00518	0.00562
Ruminococcaceae_UBA1819	0.00028	0.00039	0.00089
[Eubacterium]_siraeum_group	0.00339	0.00175	0.00115
uncultured	0.00053	0.00029	0.00058
[Eubacterium]_coprostanoligenes_group	0.00305	0.00176	0.00345
Peptococcus	0.00015	0.0001	0.00015
Anaerovoracaceae_Family_XIII_AD3011_group	0.0004	0.00025	0.0003
Anaerovoracaceae_S5-A14a	1e-05	0.00012	0.00037
uncultured	0.0002	0.00015	0.00012
Peptostreptococcaceae	0.00018	0.00036	0.00036
Romboutsia	2e-05	0.00033	8e-05
uncultured	0.00365	0.00239	0.00196
Anaerococcus	2e-05	0.00041	0.00047
Ezakiella	1e-05	7e-05	0.00073
Fenollaria	1e-05	0.0003	0.00023
Finegoldia	1e-05	0.00014	0.00036
Murdochiella	1e-05	5e-05	0.00104
Peptoniphilus	4e-05	0.00097	0.00064
uncultured	5e-05	0.00093	9e-05
Acidaminococcus	0.00032	0.00109	0.00184
Phascolarctobacterium	0.04663	0.02648	0.03321
uncultured	0.00019	0.00017	0.00014
Megamonas	0.0365	0.03159	0.03227
Mitsuokella	0.00229	0.0001	0.00075
uncultured	0.00011	0.00031	0.00019
Allisonella	0.00046	0.00021	0.00043
Dialister	0.0037	0.00759	0.00967
Megasphaera	0.00162	0.00124	0.00469
Veillonella	0.0044	0.00981	0.01058
Cetobacterium	1e-05	0.00039	0.00055
Fusobacterium	0.02928	0.01232	0.01658
Saccharimonadaceae_TM7a	0.00017	0.00025	0.00021
uncultured	0.00102	0.00068	0.00048
uncultured	9e-05	0.00013	0.0002
uncultured	0.00044	6e-05	0.00016
Parasutterella	0.00915	0.01257	0.01419
Sutterella	0.00859	0.00711	0.00992
uncultured	0.00042	0.00063	0.00049
uncultured	0.05047	0.11832	0.09044
Escherichia-Shigella	0.00086	0.00104	0.00068
Providencia	1e-05	2e-05	0.00129
uncultured	0.00536	0.00907	0.00565
Cloacibacillus	0.00018	0.00013	0.0002
Akkermansia	0.00033	0.00133	0.00235
